# Supplementary material
Source: MDPI journal article supplement (https://www.mdpi.com/2311-5629/7/1/18)
Supplement: s1 [file s1]

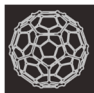

Supplimentary Materials

# Supplimentary Materials: Carbon Nanotubes Transform Soft Gellan Gum Hydrogels into Hybrid Organic–Inorganic Coatings with Excellent Cell Growth Capability

Anatolii Abalymov <sup>1,2,3</sup>, Louis Van der Meeren <sup>1</sup>, Dmitry Volodkin <sup>4</sup>, Bogdan Parakhonskiy <sup>1,\*</sup>  
and Andre G. Skirtach <sup>1,\*</sup>

<sup>1</sup> Department of Biotechnology, Ghent University, 9000 Ghent, Belgium; anatolii.abalymov@ugent.be (A.A.); louis.vandermeeren@ugent.be (L.V.d.M.)

<sup>2</sup> Remote Controlled Theranostic Systems Lab, Educational Research Institute of Nanostructures and Biosystems, Saratov State University, Saratov 410012, Russia

<sup>3</sup> Center for Photonics and Quantum Materials, Skolkovo Institute of Science and Technology, 121205 Moscow, Russia

<sup>4</sup> School of Science and Technology, Nottingham Trent University, Clifton Lane, Nottingham NG11 8NS, UK; dmitry.volodkin@ntu.ac.uk

\* Correspondence: Bogdan.Parakhonskiy@UGent.be (B.P.); Andre.Skirtach@UGent.be (A.S.)

## Materials and Methods.

### Swelling Coefficient

The swelling coefficient was calculated using Equation (1)

$$SC = \frac{m - m_0}{m_0} * 100 \quad (1)$$

where  $m$  is the mass of hydrogel and  $m_0$  is the mass of dissolved GG.

### Absorbance of GG-CNTs hydrogels:

To measure the adsorption of hydrogels, the wells of a 96-well plate were filled with 100  $\mu$ L of the GG-CNTs solution. After that, the crosslinking process took place using 100  $\mu$ L of 0.3 M CaCl<sub>2</sub> for 20 minutes. After that, calcium chloride was removed. A 595 nm filter was used to check the adsorption of the hydrogel.

**Citation:** Abalymov, A.; Van der Meeren, L.; Volodkin, D.; Parakhonskiy, B. Skirtach, A. Carbon Nanotubes Transform Soft Gellan Gum Hydrogels into Hybrid Organic-Inorganic Coatings with Excellent Cell Growth Capability. *C* **2021**, *7*, 18. <https://doi.org/10.3390/c7010018>

Received: 16 December 2020

Accepted: 30 January 2021

Published: 4 February 2021

**Publisher's Note:** MDPI stays neutral with regard to jurisdictional claims in published maps and institutional affiliations.

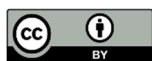

**Copyright:** © 2021 by the authors. Submitted for possible open access publication under the terms and conditions of the Creative Commons Attribution (CC BY) license (<http://creativecommons.org/licenses/by/4.0/>).

**Results and Discussion.**

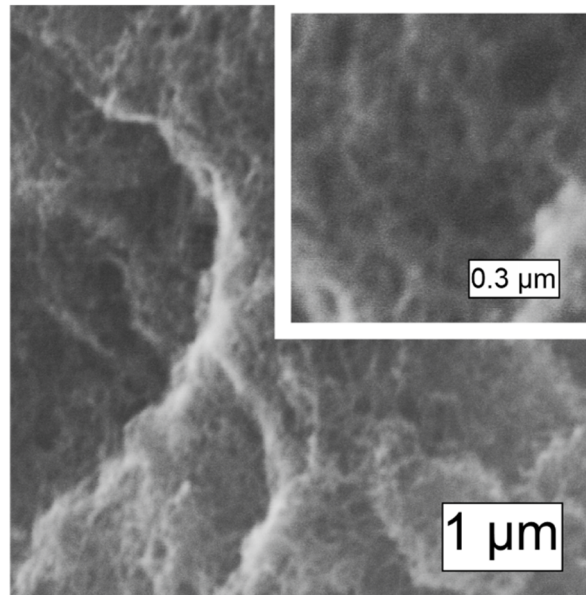

**Figure S1.** (a) SEM image of CNTs.

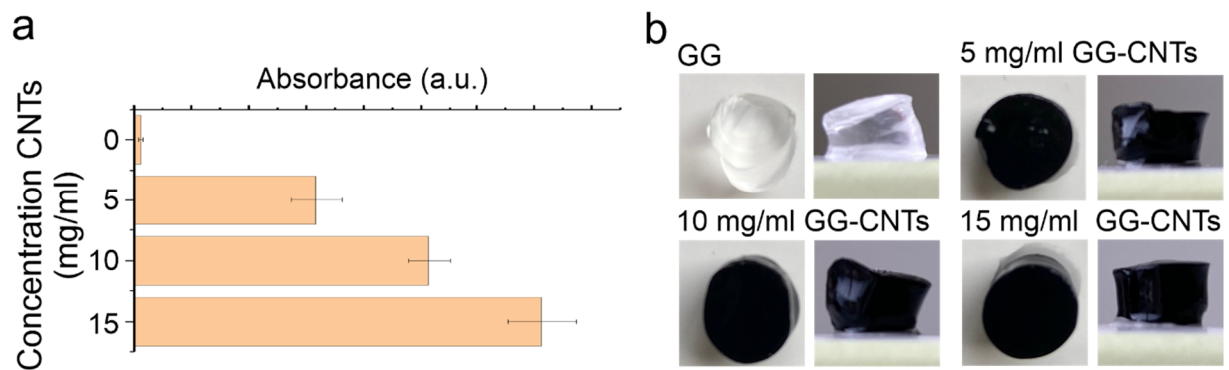

**Figure S2.** (a) Absorbance of the GG-CNTs hydrogels. (b) Photo of the GG-CNTs hydrogels.

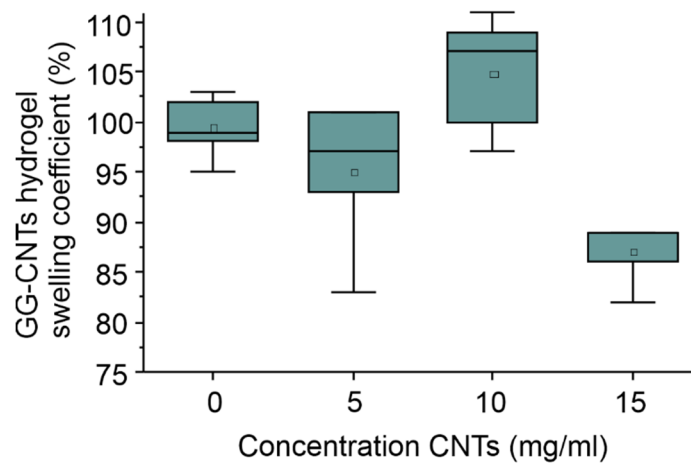

**Figure S3.** Swelling coefficient of the GG-CNTs hydrogels.

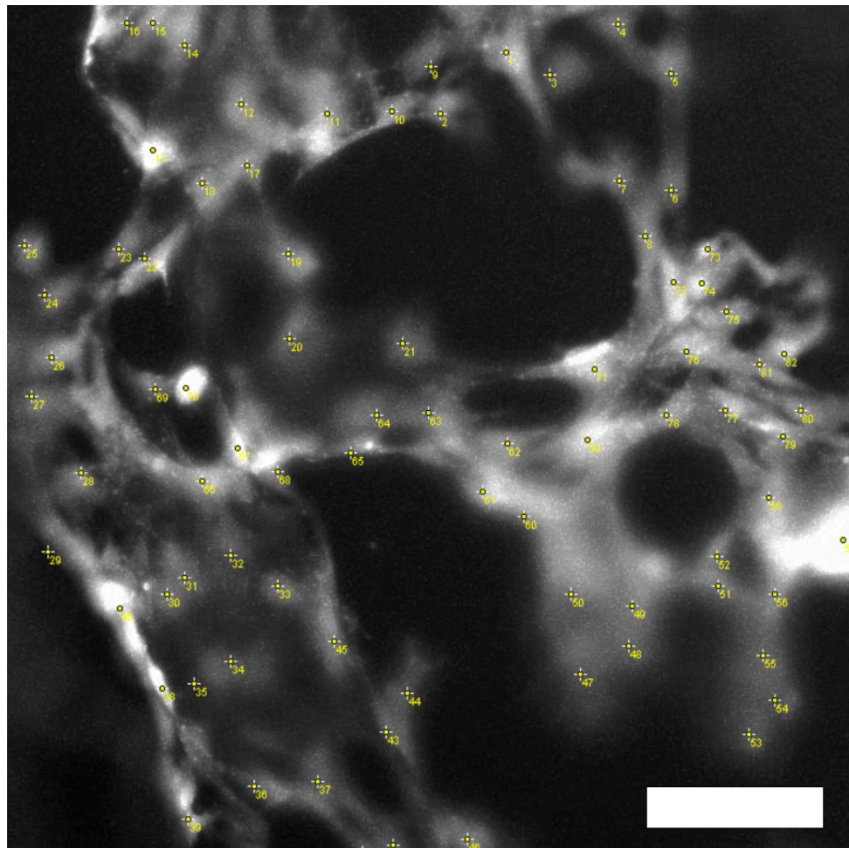

**Figure S4.** Counted cells. Scalebar is 125  $\mu\text{m}$ .
